# Supplementary material for: Crystalline ZnO/ZnSxSe1−xcore–shell nanowire arrays for efficient visible-light photoelectrocatalysis
Source: Royal Society of Chemistry journal article supplement (doi:10.1039/c4ta04293j), 2014-09-05
Supplement: c4ta04293j1.pdf [file c4ta04293j1.pdf]

## Crystalline ZnO/ZnS<sub>x</sub>Se<sub>1-x</sub> core-shell nanowire arrays for efficient visible-light photoelectrocatalysis

Yajun Wang <sup>a,b</sup>, Xueying Zhan <sup>a</sup>, Fengmei Wang <sup>a</sup>, Qisheng Wang <sup>a</sup>, Muhammad  
Safdar <sup>a</sup> and Jun He <sup>a,\*</sup>

<sup>a</sup> National Center for Nanoscience and Technology (NCNST), No.11

ZhongGuanCun BeiYiTiao, 100190 Beijing, P.R. China

<sup>b</sup> State Key Laboratory of Heavy Oil Processing, China University of Petroleum,  
102249 Beijing, P.R. China.

### Supplementary data

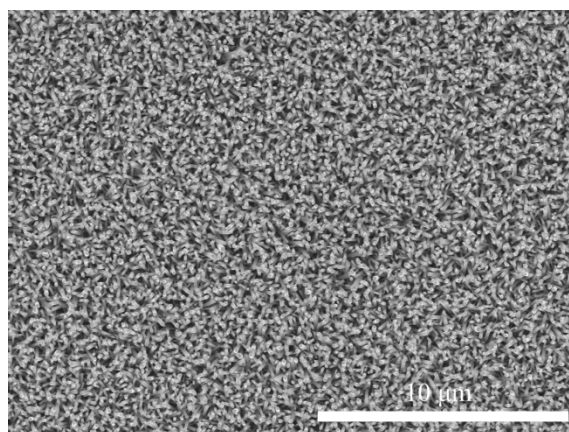

Fig. S1 Large scale SEM image of ZnO/ZnS<sub>x</sub>Se<sub>1-x</sub> nanowires

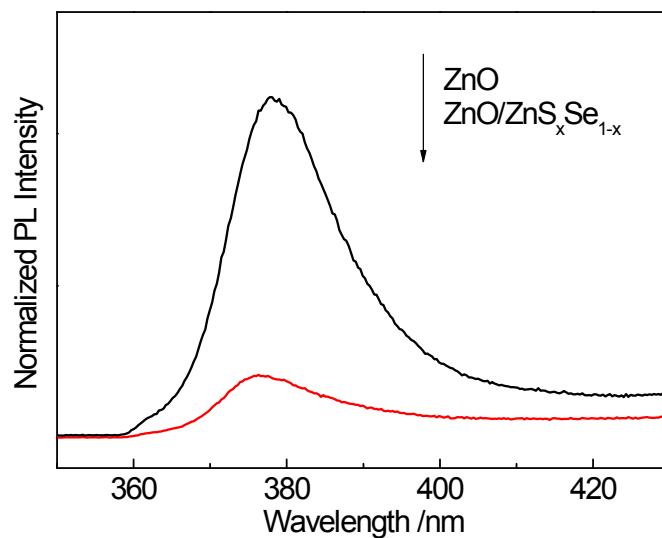

Fig. S2 PL spectra of ZnO and ZnO/ZnS<sub>x</sub>Se<sub>1-x</sub> core/shell nanowire arrays

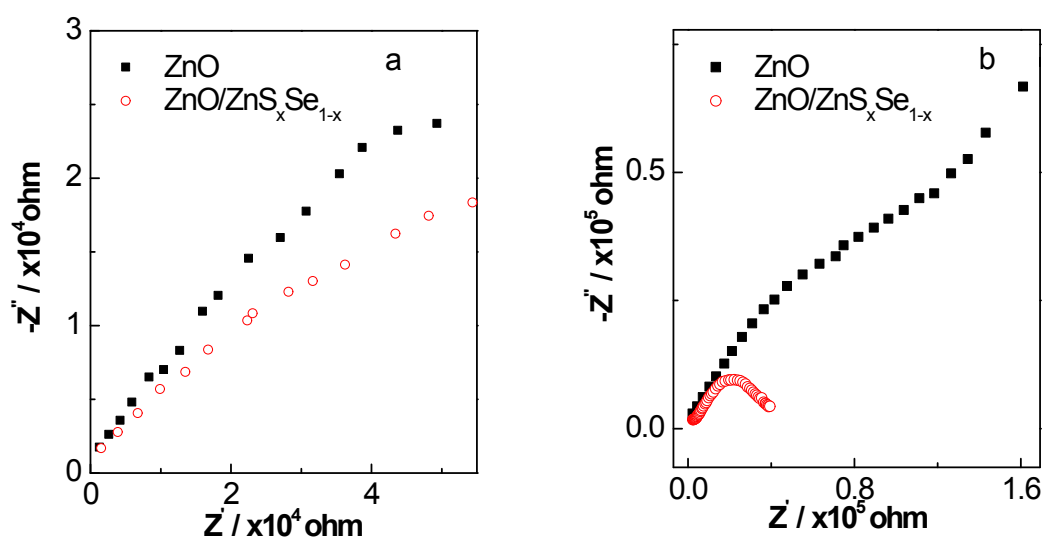

Fig.S3 EIS Nyquist plots of ZnO nanowire arrays and ZnO/ZnS<sub>x</sub>Se<sub>1-x</sub> core/shell nanowire arrays (a) under UV irradiation, (b) under visible light irradiation

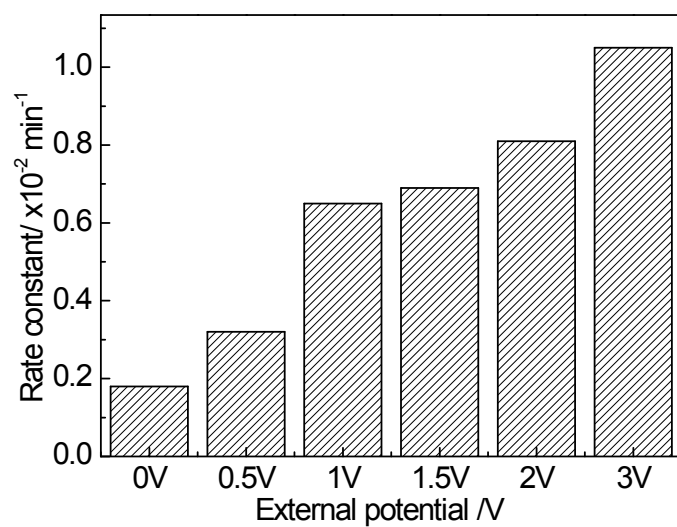

Fig.S4 The effect of the external potential on MB degradation on ZnO/ZnS<sub>x</sub>Se<sub>1-x</sub> core/shell nanowires under UV irradiation.
